# Supplementary material
Source: ML conference proceedings conference paper supplement (https://openreview.net/forum?id=86dXbqT5Ua)
Supplement: supplementary_material [file attachment]

---

# Geometry-Informed Neural Operator for Large-Scale 3D PDEs

---

Anonymous Author(s)

Affiliation

Address

email

## Abstract

We propose the geometry-informed neural operator (GINO), a highly efficient approach to learning the solution operator of large-scale partial differential equations with varying geometries. GINO uses a signed distance function (SDF) and point-cloud representations of the input shape and neural operators based on graph and Fourier architectures to learn the solution operator. The graph neural operator handles irregular grids and transforms them into and from regular latent grids on which Fourier neural operator can be efficiently applied. We provide an efficient implementation of GINO using an optimized hashing approach, which allows efficient learning in a shared, compressed latent space with reduced computation and memory costs. GINO is discretization-invariant, meaning the trained model can be applied to arbitrary discretizations of the continuous domain and applies to any shape or resolution. To empirically validate the performance of our method on large-scale simulation, we generate the industry-standard aerodynamics dataset of 3D vehicle geometries with Reynolds numbers as high as five million. For this large-scale 3D fluid simulation, numerical methods are expensive to compute surface pressure. We successfully trained GINO to predict the pressure on car surfaces using only five hundred data points. We obtained a  $100,000\times$  speed-up compared to optimized GPU-based computational fluid dynamics (CFD) simulators. When tested on new combinations of geometries and boundary conditions (inlet velocities), GINO obtains a  $2\times$  reduction in error rate compared to deep neural network approaches. Our method is the first ML method to do full-field 3D CDF simulations at this level of complexity and realism.

## 1 Introduction

Computational sciences aim to understand natural phenomena and develop computational models to study the physical world around us. Many natural phenomena follow the first principles of physics and are often described as evolution on function spaces, governed by partial differential equations (PDE). Various numerical methods, including finite difference and finite element methods, have been developed as computational approaches for solving PDEs. However, these methods need to be run at very high resolutions to capture detailed physics, which are time-consuming and expensive, and often beyond the available computation capacity. For instance, in computational fluid dynamics (CFD), given a shape design, the goal is to solve the Navier-Stokes equation and estimate physical properties such as pressure and velocity. Finding the optimal shape design often requires solving thousands of trial shapes, each of which can take more than ten hours even with GPUs [1].

To overcome these computational challenges, recent works propose deep learning-based methods, particularly neural operators [2], to speed up the simulation and inverse design. Neural operators generalize neural networks and learn operators, which are mappings between infinite-dimensional function spaces [2]. Neural operators are discretization invariant and can approximate general operators [3]. The input function to neural operators can be presented at any discretization, grid,

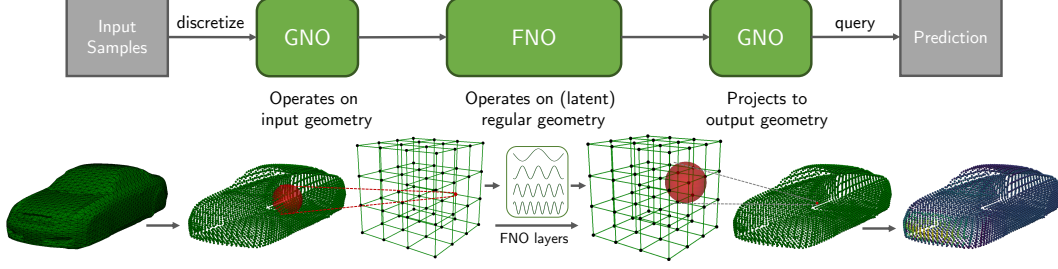

Figure 1: **The architecture of GINO.** The input geometries are irregular and change for each sample. These are discretized into point clouds and passed on to a GNO layer, which maps from the given geometry to a latent regular grid. The output of this GNO layer is concatenated with the SDF features and passed into an FNO model. The output from the FNO model is projected back onto the domain of the input geometry for each query point using another GNO layer. This is used to predict the target function (e.g., pressure), which is used to compute the loss that is optimized end-to-end for training.

39 resolution, or mesh, and the output function can be evaluated at any arbitrary point. Neural operators  
40 have shown promise in learning solution operators in partial differential equations (PDE) [3] with  
41 numerous applications in scientific computing, including weather forecasting [4], carbon dioxide  
42 storage and reservoir engineering [5], with a tremendous speedup over traditional methods. Prior  
43 works on neural operators developed a series of principled neural operator architectures to tackle  
44 a variety of scientific computing applications. Among the neural operators, graph neural operators  
45 (GNO) [2], and Fourier neural operators (FNO) [6] have been popular in various applications.

46 GNO implements kernel integration with graph structures and is applicable to complex geometries  
47 and irregular grids. The kernel integration in GNO shares similarities with the message-passing  
48 implementation of graph neural networks (GNN) [7], which is also used in scientific computing [8–  
49 10]. However, the main difference is that GNO defines the graph connection in a ball defined on  
50 the physical space, while GNN typically assumes a fixed set of neighbors, e.g.,  $k$ -nearest neighbors,  
51 see Figure 4. Such nearest-neighbor connectivity in GNN violates discretization invariance, and  
52 it degenerates into a pointwise operator at high resolutions, leading to a poor approximation of  
53 the ground-truth operator using GNN. In contrast, GNO adapts the graph based on points within a  
54 physical space, allowing for universal approximation of operators. However, one limitation of graph-  
55 based methods is the computational complexity when applied to problems with long-range global  
56 interactions. To overcome this, prior works propose using multi-pole methods or multi-level graphs  
57 [11, 12] to help with global connectivity. However, they do not fully alleviate the problem since they  
58 require many such levels to capture global dependence, which still makes them expensive.

59 While GNO performs kernel integration in the physical space using graph operations, FNO leverages  
60 Fourier transform to represent the kernel integration in the spectral domain using Fourier modes. This  
61 architecture is applicable to general geometries and domains since the (continuous) Fourier transform  
62 can be defined on any domain. However, it becomes computationally efficient when applied to regular  
63 input grids since the continuous Fourier transform can then be efficiently approximated using discrete  
64 Fast Fourier transform (FFT) [13], giving FNO a significant quasi-linear computational complexity.  
65 However, FFT limits FNO to regular grids and cannot directly deal with complex geometries and  
66 irregular grids. A recent model, termed GeoFNO, learns a deformation from a given geometry to  
67 a latent regular grid [14] so that the FFT can be applied in the latent space. In order to transform  
68 the latent regular grid back to the irregular physical domain, discrete Fourier transform (DFT) on  
69 irregular grids is employed. However, DFT on irregular grids is more expensive than FFT, quadratic  
70 vs. quasi-linear, and does not approximate the Fourier transform in a discretization invariant manner.  
71 This is because, unlike in the regular setting, the points are not sampled at regular intervals, and  
72 therefore the integral does not take into account the underlying measure. Other attempts share a  
73 similar computational barrier as shown in Table 1, which we discussed in Section 5.

74 **In this paper,** we consider learning the solution operator for large-scale PDEs, in particular, 3D  
75 CFD simulations. We propose the geometry-informed neural operator (GINO), a neural operator  
76 architecture for arbitrary geometries and mesh discretizations. It uses a signed distance function  
77 (SDF) to represent the geometry and composes GNO and FNO architectures together in a principled  
78 manner to exploit the strengths of both frameworks.

Table 1: **Computational complexity of standard deep learning models.**  $N$  is the number of mesh points;  $d$  is the dimension of the domain and degree is the maximum degree of the graph. Even though GNO and transformer both work on irregular grids and are discretization invariant, they become too expensive on large-scale problems.

| Model        | Range      | Complexity                     | Irregular grid | Discretization invariant |
|--------------|------------|--------------------------------|----------------|--------------------------|
| GNN          | local      | $O(N\text{degree})$            | ✓              | ✗                        |
| CNN          | local      | $O(N)$                         | ✗              | ✗                        |
| UNet         | global     | $O(N)$                         | ✗              | ✗                        |
| Transformer  | global     | $O(N^2)$                       | ✓              | ✓                        |
| GNO (kernel) | radius $r$ | $O(N\text{degree})$            | ✓              | ✓                        |
| FNO (FFT)    | global     | $O(N \log N)$                  | ✗              | ✓                        |
| GINO [Ours]  | global     | $O(N \log N + N\text{degree})$ | ✓              | ✓                        |

The GNO by itself can handle irregular grids through graphs but is able to operate only locally under a limited computational budget, while the FNO can capture global interactions, but requires a regular grid. By using GNO to transform the irregular grid into a regular one for the FNO block, we can get the best of both worlds, i.e., computational efficiency and accuracy of the approximation. Thus, this architecture tackles the issue of expensive global integration operations that were unaddressed in prior works, while maintaining discretization invariance.

Specifically, GINO has three main components, (i) **Geometry encoder**: multiple local kernel integration layers through GNO with graph operations, (ii) **Global model**: a sequence of FNO layers for global kernel integration, and (iii) **Geometry decoder**: the final kernel integral layers, as shown in Figure 1. The input to the GINO is the input surface (as a point cloud) along with the SDF, representing the distance of each 3D point to the surface. GINO is trained end-to-end to predict output (e.g., car surface pressure in our experiments), a function defined on the geometry surfaces.

**Geometry encoder**: the first component in the GINO architecture uses the surface (i.e., point cloud) and SDF features as inputs. The irregular grid representation of the surface is encoded through local kernel integration layers implemented with GNOs, consisting of local graphs that can handle different geometries and irregular grids. The encoded function is evaluated on a regular grid, which is concatenated with the SDF input evaluated on the same grid. **Global model**: the output of the first component is encoded on a regular grid, enabling efficient learning with an FNO using FFT. Our second component consists of multiple FNO layers for efficient global integration. In practice, we find that this step can be performed at a lower resolution without significantly impacting accuracy, giving a further computational advantage. **Geometry decoder**: the final component is composed of local GNO-based layers with graph operations, that decode the output of the FNO and project it back onto the desired geometry, making it possible to efficiently query the output function on irregular meshes. The GNO layers in our framework are accelerated using our GPU-based hash-table implementation of neighborhood search for graph connectivity of meshes.

We validate our findings on two large-scale 3D CFD datasets. We generate our own large-scale industry-standard Ahmed’s body geometries using GPU-based OpenFOAM [15], composed of 500+ car geometries with  $O(10^5)$  mesh points on the surface and  $O(10^7)$  mesh points in space. Each simulation takes 7-19 hours on 16 CPU cores and 2 Nvidia V100 GPUs. Further, we also study a lower resolution dataset with more realistic car shapes, viz., Shape-Net car geometries generated by [16]. GINO takes the point clouds and SDF features as the input and predicts the pressure fields on the surfaces of the vehicles. We demonstrate that GINO enjoys a  $100,000\times$  speed-up over the GPU-based OpenFOAM solver while achieving 8.31% (Ahmed-body) and 7.29% (Shape-Net car) error rates, which is only about half compared to existing neural networks such as U-Net [17, 18]. Further, GINO is capable of zero-shot super-resolution, training with only one-eighth of the mesh points, and having a good accuracy when evaluated on the full mesh that is not seen during training.

## 2 Problem setting

We are interested in learning the map from the geometry of a PDE to its solution. We will first give a general framework and then discuss the Navier-Stokes equation in CFD as an example. Let  $D \subset \mathbb{R}^d$  be a Lipschitz domain and  $\mathcal{A}$  a Banach space of real-valued functions on  $D$ . We consider the set of

distance functions  $\mathcal{T} \subset \mathcal{A}$  so that, for each function  $T \in \mathcal{T}$ , its zero set  $S_T = \{x \in D : T(x) = 0\}$  defines a  $(d - 1)$ -dimensional sub-manifold. We assume  $S_T$  is simply connected, closed, smooth, and that there exists  $\epsilon > 0$  such that  $B_\epsilon(x) \cap \partial D = \emptyset$  for every  $x \in S_T$  and  $T \in \mathcal{T}$ . We denote by  $Q_T \subset D$ , the open volume enclosed by the sub-manifold  $S_T$  and assume that  $Q_T$  is a Lipschitz domain with  $\partial Q_T = S_T$ . We define the Lipschitz domain  $\Omega_T := D \setminus \bar{Q}_T$  so that,  $\partial\Omega_T = \partial D \cup S_T$ . Let  $\mathcal{L}$  denote a partial differential operator and consider the problem

$$\begin{aligned} \mathcal{L}(u) &= f, & \text{in } \Omega_T, \\ u &= g, & \text{in } \partial\Omega_T, \end{aligned} \quad (1)$$

for some  $f \in \mathcal{F}$ ,  $g \in \mathcal{B}$  where  $\mathcal{B}$ ,  $\mathcal{F}$  denote Banach spaces of functions on  $\mathbb{R}^d$  with the assumption that the evaluation functional is continuous in  $\mathcal{B}$ . We assume that  $\mathcal{L}$  is such that, for any triplet  $(T, f, g)$ , the PDE (1) has a unique solution  $u \in \mathcal{U}_T$  where  $\mathcal{U}_T$  denotes a Banach space of functions on  $\Omega_T$ . Let  $\mathcal{U}$  denote a Banach space of functions on  $D$  and let  $\{E_T : \mathcal{U}_T \rightarrow \mathcal{U} : T \in \mathcal{T}\}$  be a family of extension operators which are linear and bounded. We define the mapping from the distance function to the solution function

$$\Psi : \mathcal{T} \times \mathcal{F} \times \mathcal{B} \rightarrow \mathcal{U} \quad (2)$$

by  $(T, f, g) \mapsto E_T(u)$  which is our operator of interest.

**Navier-Stokes Equation.** We illustrate the above abstract formulation with the following example. Let  $D = (0, 1)^d$  be the unit cube and let  $\mathcal{A} = C(\bar{D})$ . We take  $\mathcal{T} \subset \mathcal{A}$  to be some subset such that the zero level set of every element defines a  $(d - 1)$ -dimensional closed surface which can be realized as the graph of a Lipschitz function and that there exists  $\epsilon > 0$  such that each surface is at least distance  $\epsilon$  away from the boundary of  $D$ . We now consider the steady Navier-Stokes equations,

$$\begin{aligned} -\nu \Delta v + (v \cdot \nabla)v + \nabla p &= f, & \text{in } \Omega_T, \\ \nabla \cdot v &= 0, & \text{in } \Omega_T, \\ v &= q, & \text{in } \partial D, \\ v &= 0, & \text{in } S_T, \end{aligned} \quad (3)$$

where  $v : \Omega_T \rightarrow \mathbb{R}^d$  is the velocity,  $p : \Omega_T \rightarrow \mathbb{R}$  is the pressure,  $\nu$  is the viscosity, and  $f, q : \mathbb{R}^d \rightarrow \mathbb{R}^d$  are the forcing and boundary functions. The condition that  $v = 0$  in  $S_T$  is commonly known as a “no slip” boundary and is prevalent in many engineering applications. The function  $q$ , on the other hand, defines the inlet and outlet boundary conditions for the flow. We assume that  $f \in H^{-1}(\mathbb{R}^d; \mathbb{R}^d)$  and  $q \in C(\mathbb{R}^d; \mathbb{R}^d)$ . We can then define our boundary function  $g \in C(\mathbb{R}^d; \mathbb{R}^d)$  such that  $g(x) = 0$  for any  $x \in D$  with  $\text{dist}(x, \partial D) \geq \epsilon$  and  $g(x) = q(x)$  for any  $x \in D$  with,  $\text{dist}(x, \partial D) > \epsilon/2$  as well as any  $x \notin D$ . Continuity of  $g$  can be ensured by an appropriate extension for any  $x \in D$  such that  $\text{dist}(x, \partial D) < \epsilon$  and  $\text{dist}(x, \partial D) \geq \epsilon/2$  [19]. We define  $u : \Omega_T \rightarrow \mathbb{R}^{d+1}$  by  $u = (v, p)$  as the unique weak solution of (3) with  $\mathcal{U}_T = H^1(\Omega_T; \mathbb{R}^d) \times L^2(\Omega_T)/\mathbb{R}$  [20]. We define  $\mathcal{U} = H^1(D; \mathbb{R}^d) \times L^2(D)/\mathbb{R}$  and the family of extension operators  $\{E_T : \mathcal{U}_T \rightarrow \mathcal{U}\}$  by  $E_T(u) = (E_T^v(v), E_T^p(p))$  where  $E_T^v : H^1(\Omega_T; \mathbb{R}^d) \rightarrow H^1(D; \mathbb{R}^d)$  and  $E_T^p : L^2(\Omega_T)/\mathbb{R} \rightarrow L^2(D)/\mathbb{R}$  are defined as the restriction onto  $D$  of the extension operators defined in [21, Chapter VI, Theorem 5]. This establishes the existence of the operator  $\Psi : \mathcal{T} \times H^{-1}(\mathbb{R}^d; \mathbb{R}^d) \times C(\mathbb{R}^d; \mathbb{R}^d) \rightarrow H^1(D; \mathbb{R}^d) \times L^2(D)/\mathbb{R}$  mapping the geometry, forcing, and boundary condition to the (extended) solution of the steady Navier-Stokes equation (3). Homomorphic extensions of deformation-based operators have been shown in [22]. We leave for future work studying the regularity properties of the presently defined operator.

### 3 Geometric-Informed Neural Operator

We propose a geometry-informed neural operator (GINO), a neural operator architecture for varying geometries and mesh regularities. GINO is a deep neural operator model consisting of three main components, (i) multiple local kernel integration layers, (ii) a sequence of FNO layers for global kernel integration which precedes (iii) the final kernel integral layers. Each layer of GINO follows the form of generic kernel integral of the form (5). Local integration is computed using graphs, while global integration is done in Fourier space.

#### 3.1 Neural operator

A neural operator  $\Psi$  [3] maps the input functions  $a = (T, f, g)$  to the solution function  $u$ . The neural operator  $\Psi$  is composed of multiple layers of point-wise and integral operators,

$$\Psi = \mathcal{Q} \circ \mathcal{K}_L \circ \dots \circ \mathcal{K}_1 \circ \mathcal{P}. \quad (4)$$



163 The first layer  $\mathcal{P}$  is a pointwise operator parameterized by a neural network. It transforms the input  
 164 function  $a$  into a higher-dimensional latent space  $\mathcal{P} : a \mapsto v_0$ . Similarly, the last layer acts as a  
 165 projection layer, which is a pointwise operator  $\mathcal{Q} : v_l \mapsto u$ , parameterized by a neural network  $Q$ .  
 166 The model consists of  $L$  layers of integral operators  $\mathcal{K}_l : v_{l-1} \mapsto v_l$  in between.

$$v_l(x) = \int_D \kappa_l(x, y) v_{l-1}(y) dy \quad (5)$$

167 where  $\kappa_l$  is a learnable kernel function. Non-linear activation functions are incorporated between  
 168 each layer.

### 169 3.2 Graph operator block

170 To efficiently compute the integral in equation (5), we truncate the integral to a local ball at  $x$  with  
 171 radius  $r > 0$ , as done in [2],

$$v_l = \int_{B_r(x)} \kappa(x, y) v_{l-1}(y) dy. \quad (6)$$

172 We discretize the space and use a Riemann sum to compute the integral. This process involves  
 173 uniformly sampling the input mesh points and connecting them with a graph for efficient parallel  
 174 computation. Specifically, for each point  $x \in D$ , we randomly sample points  $\{y_1, \dots, y_M\} \subset B_r(x)$   
 175 and approximate equation (6) as

$$v_l(x) \approx \sum_{i=1}^M \kappa(x, y_i) v_{l-1}(y_i) \mu(y_i), \quad (7)$$

176 where  $\mu$  denotes the Riemannian sum weights corresponding to the ambient space of  $B_r(x)$ . For a  
 177 fixed input mesh of  $N$  points, the computational cost of equation (7) scales with the number of edges,  
 178 denoted as  $O(E) = O(MN)$ . Here, the number of sampling points  $M$  is the degree of the graph. It  
 179 can be either fixed to a constant sampling size, or scale with the area of the ball.

180 **Encoder.** Given an input point cloud  $\{x_1^{\text{in}}, \dots, x_N^{\text{in}}\} \subset S_T$ , we employ a GNO-encoder to transform  
 181 it to a function on a uniform latent grid  $\{x_1^{\text{grid}}, \dots, x_S^{\text{grid}}\} \subset D$ . The encoder is computed as  
 182 discretization of an integral operator  $v_0(x^{\text{grid}}) \approx \sum_{i=1}^M \kappa(x^{\text{grid}}, y_i^{\text{in}}) \mu(y_i^{\text{in}})$  over ball  $B_{r_{\text{in}}}(x^{\text{grid}})$ . To  
 183 inform the grid density, GINO computes Riemannian sum weights  $\mu(y_i^{\text{in}})$ . Further, we use Fourier  
 184 features in the kernel [23]. For simple geometries, this encoder can be omitted, see Section 4.

185 **Decoder.** Similarly, given a function defined on the uniform latent grid  $\{x_1^{\text{grid}}, \dots, x_S^{\text{grid}}\} \subset D$ , we  
 186 use a GNO-decoder to query arbitrary output points  $\{x_1^{\text{out}}, \dots, x_N^{\text{out}}\} \subset \Omega_T$ . The output is evaluated  
 187 as  $u(x^{\text{out}}) \approx \sum_{i=1}^M \kappa(x^{\text{out}}, y_i^{\text{grid}}) v_l(y_i^{\text{grid}}) \mu(y_i^{\text{grid}})$  over ball  $B_{r_{\text{out}}}(x^{\text{out}})$ . Here, the Riemannian weight,  
 188  $\mu(y_i^{\text{grid}}) = 1/S$  since we choose the latent space to be regular grid. Since the queries are independent,  
 189 we divide the output points into small batches and run them in parallel, which enables us to use much  
 190 larger models by saving memory.

191 **Efficient graph construction.** The graph construction requires finding neighbors to each node  
 192 that are within a certain radius. The simplest solution is to compute all possible distances between  
 193 neighbors, which requires  $O(N^2)$  computation and memory. However, as the  $N$  gets larger, e.g.,  $10$   
 194  $\sim 100$  million, computation and memory become prohibitive even on modern GPUs. Instead, we  
 195 use a hash grid-based implementation to efficiently prune candidates that are outside of a  $\ell^\infty$ -ball  
 196 first and then compute the  $\ell^2$  distance between only the candidates that survive. This reduces the  
 197 computational complexity to  $O(Ndr^3)$  where  $d$  denotes unit density and  $r$  is the radius. This can be  
 198 efficiently done using first creating a hash table of voxels with size  $r$ . Then, for each node, we go over  
 199 all immediate neighbors to the current voxel that the current node falls into and compute the distance  
 200 between all points in these neighboring voxels. Specifically, we use the CUDA implementation from  
 201 Open3D [24]. Then, using the neighbors, we compute the kernel integration using gather-scatter  
 202 operations from torch-scatter [25]. Further, if the degree of the graph gets larger, we can add Nyström  
 203 approximation by sampling nodes [2].

### 204 3.3 Fourier operator block

205 The geometry encoding  $v_0$  and the geometry specifying map  $T$ , both evaluated on a regular grid  
 206 discretizing  $D$  are passed to a FNO block. We describe the basic FNO block as first outlined in [6].

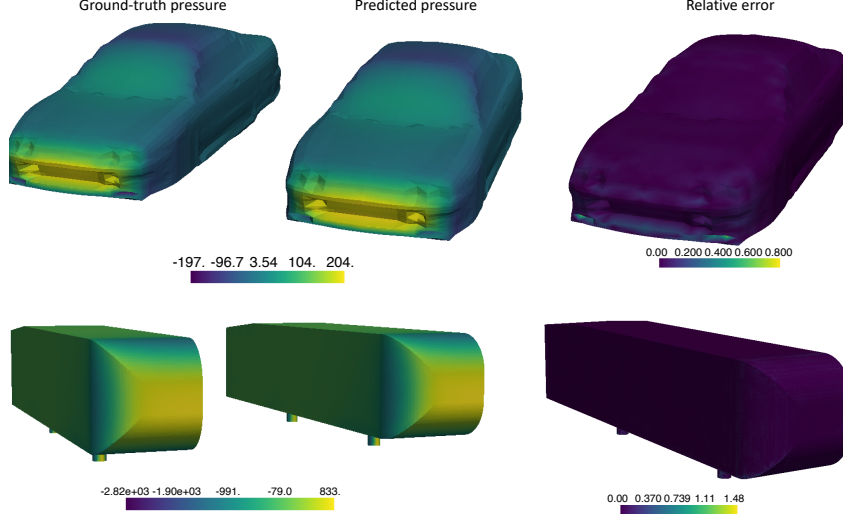

Figure 2: **Visualization of a ground-truth pressure and corresponding prediction by GINO** from the Shape-Net Car (**top**) and Ahmed-body (**bottom**) datasets, as well as the absolute error.

We will first define global convolution in the Fourier space and use it to build the full FNO operator block. To that end, we will work on the  $d$ -dimensional unit torus  $\mathbb{T}^d$ . We define an integral operator with kernel  $\kappa \in L^2(\mathbb{T}^d; \mathbb{R}^{n \times m})$  as the mapping  $\mathcal{C} : L^2(\mathbb{T}^d; \mathbb{R}^m) \rightarrow L^2(\mathbb{T}^d; \mathbb{R}^n)$  given by

$$\mathcal{C}(v) = \mathcal{F}^{-1}(\mathcal{F}(\kappa) \cdot \mathcal{F}(v)), \quad \forall v \in L^2(\mathbb{T}^d; \mathbb{R}^m)$$

Here  $\mathcal{F}, \mathcal{F}^{-1}$  are the Fourier transform and its inverse respectively, defined for  $L^2$  by the appropriate limiting procedure. The Fourier transform of the function  $\kappa$  will be parameterized directly by some fixed number of Fourier modes, denoted  $\alpha \in \mathbb{N}$ . In particular, we assume

$$\kappa(x) = \sum_{\gamma \in I} c_{\gamma} e^{i\langle \gamma, x \rangle}, \quad \forall x \in \mathbb{T}^d$$

for some index set  $I \subset \mathbb{Z}^d$  with  $|I| = \alpha$  and coefficients  $c_{\gamma} \in \mathbb{C}^{n \times m}$ . Then we may view  $\mathcal{F} : L^2(\mathbb{T}^d; \mathbb{R}^{n \times m}) \rightarrow \ell^2(\mathbb{Z}^d; \mathbb{C}^{n \times m})$  so that  $\mathcal{F}(\kappa)(\gamma) = c_{\gamma}$  if  $\gamma \in I$  and  $\mathcal{F}(\kappa)(\gamma) = 0$  if  $\gamma \notin I$ . We directly learn the coefficients  $c_{\gamma}$  without ever having to evaluate  $\kappa$  in physical space. We then define the full operator block  $\mathcal{K} : L^2(\mathbb{T}^d; \mathbb{R}^m) \rightarrow L^2(\mathbb{T}^d; \mathbb{R}^n)$  by

$$\mathcal{K}(v)(x) = \sigma(Wv(x) + \mathcal{C}(v)), \quad \forall x \in \mathbb{T}^d$$

where  $\sigma$  is a pointwise non-linearity and  $W \in \mathbb{R}^{n \times m}$  is a learnable matrix. We further modify the layer by learning the kernel coefficients in tensorized form, adding skip connections, normalization layers, and learnable activations as outlined in [26]. We refer the reader to this work for further details.

**Adaptive instance normalization.** For many engineering problems of interest, the boundary information is a fixed, scalar, inlet velocity specified on some portion of  $\partial D$ . In order to efficiently incorporate this scalar information into our architecture, we use a learnable adaptive instance normalization [27] combined with a Fourier feature embedding [23]. In particular, the scalar velocity is embedded into a vector with Fourier features. This vector then goes through a learnable MLP, which outputs the scale and shift parameters of an instance normalization layer [28]. In problems where the velocity information is not fixed, we replace the normalization layers of the FNO blocks with this adaptive normalization. We find this technique improves performance, since the magnitude of the output fields usually strongly depends on the magnitude of the inlet velocity.

## 4 Experiments

We explore a range of models on two CFD datasets. The large-scale Ahmed-Body dataset, which we generated, and also the Shape-Net Car dataset from [16]. Both datasets contain simulations of

Table 2: **Benchmark comparison on the Ahmed-body and Shape-Net Car dataset.**

| Model                  | Ahmed-body (100k points) |              | Shape-Net Car (3.7k points) |              |
|------------------------|--------------------------|--------------|-----------------------------|--------------|
|                        | training error           | test error   | training error              | test error   |
| GNO                    | -                        | -            | 24.89%                      | 18.77%       |
| Geo-FNO (sphere)       | -                        | -            | 10.79%                      | 15.85%       |
| UNet (interp)          | 14.34%                   | 14.80%       | 12.48%                      | 12.83%       |
| FNO (interp)           | 12.97%                   | 12.59%       | 9.65%                       | 9.42%        |
| GINO (encoder-decoder) | 9.36%                    | 9.01%        | 7.95%                       | 9.47%        |
| GINO (decoder)         | 9.34%                    | <b>8.31%</b> | 6.37%                       | <b>7.12%</b> |

Previous works such as GNO and Geo-FNO cannot scale to large meshes with 100k points. For UNet, FNO, and GINO, we fix the latent grid to  $64 \times 64 \times 64$ . The training error is normalized L2; the test error is de-normalized L2.

the Reynold-Averaged Navier-Stokes (RANS) equations for a chosen turbulence model. The goal is to estimate the full pressure field given the shape of the vehicle as input. We consider GNO [2], GeoFNO [14], 3D UNet [18] with linear interpolation, FNO [6], and GINO. We train each model for 100 epochs with Adam optimizer and step learning rate scheduler. The implementation details can be found in the Appendix. All models run on a single Nvidia V100 GPU.

#### 4.1 Ahmed-Body dataset

We generate the industry-level vehicle aerodynamics simulation based on the Ahmed-body shapes [29]. The shapes are parameterized with six design parameters: length, width, height, ground clearance, slant angle, and fillet radius. We also vary the inlet velocity from 10m/s to 70m/s, leading to Reynolds numbers ranging from  $4.35 \times 10^5$  to  $6.82 \times 10^6$ . We use the GPU-accelerated OpenFOAM solver for steady state simulation using the SST  $k - \omega$  turbulence model [30] with 7.2 million mesh points in total with 100k mesh points on the surface. Each simulation takes 7-19 hours on 2 Nvidia v100 GPUs with 16 CPU cores. We generate 551 shapes in total and divide them into 500 for training and 51 for validation.

#### 4.2 Shape-Net Car dataset

We also consider the Car dataset generated by [16]. The input shapes are from the ShapeNet Car category [31]. In [16], the shapes are manually modified to remove the side mirrors, spoilers, and tires. The RANS equations with the  $k - \epsilon$  turbulence model and SUPG stabilization are simulated to obtain the time-averaged velocity and pressure fields using a finite element solver [32]. The inlet velocity is fixed at 20m/s (72km/h) and the estimated Reynolds number is  $5 \times 10^6$ . Each simulation takes approximately 50 minutes. The car surfaces are stored with 3.7k mesh points. We take the 611 water-tight shapes out of the 889 instances, and divide the 611 instances into 500 for training and 111 for validation.

As shown in Table 2 and Figure 2, GINO achieves the best error rate with a large margin compared with previous methods. It takes 0.1 seconds to evaluate, which is 100,000x faster than the GPU-parallel OpenFOAM solver that take 10 hours to generates the data.

#### 4.3 Discretization-invariance and ablation studies

We investigate discretization-invariance by varying different parts of GINO. Specifically, we vary the latent grid resolution and the sampling rates for input-output meshes. In these experiments, we fixed the training and test samples to be the same, i.e., same latent grid resolution or sampling rate, but varied the shape and input conditions.

**Discretization-invariance wrt the latent grid.** Here, each model is trained and tested on (the same) latent resolutions, specifically 32, 48, 64, 80, and 88, and the architecture is the same. As depicted in Figure 3(a), GINO demonstrates a comparable error rate across all resolutions. A minor improvement in errors is observed when employing a larger latent space. Conversely, the errors associated with the UNet model grow as the resolution is decreased due to the decreasing receptive field of its local convolution kernels.

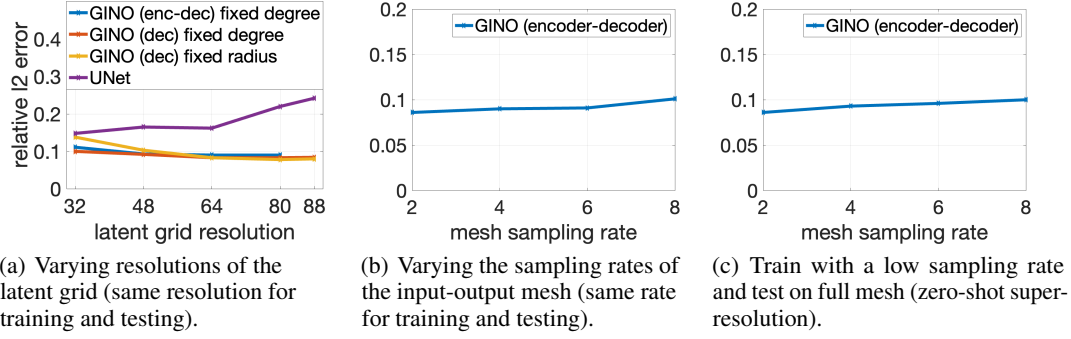

Figure 3: **Discretization-invariant studies and zero-shot super-resolution.**

**Discretization-invariance in the input-output mesh.** Here, GINO is trained and tested with sub-sampled input-output meshes at various sampling rates (2x, 4x, 6x, 8x). As illustrated in Figure 3(b), GINO exhibits a consistent error rate across all sampling rates. A slight increase in errors is observed on coarser meshes.

**Zero-shot super-resolution.** GINO possesses the ability to perform zero-shot super-resolution. The model is trained on a coarse dataset, sub-sampled by 2x, 4x, 6x, and 8x, and subsequently tested on the full mesh, that is not seen during training. The error remains consistent across all sampling rates 3(c). This characteristic enables the model to be trained at a coarse resolution when the mesh is dense, consequently reducing the computational requirements.

## 5 Related Work

The study of neural operators and their extended applications in learning solution operators in PDE has been gaining momentum [3, 33–35]. A method that stands out is FNO, which uses Fourier transform [6]. The FNO and its variations have proven to highly accelerate the simulations for large-scale flow problems, including weather forecasting [4], seismology [36, 37] and multi-phase flow [5]. However, a challenge with the FNO is that its computation superiority is gained when applied on a regular grid, where the Fourier transform is approximated using FFT. Therefore, its reliance on FFT limits its use with irregular grids or complex geometries. There have been attempts to modify the FNO to work with these irregular structures, but scalability to large-scale 3D PDEs remains an issue. One such attempt is GeoFNO, which learns a coordinate transformation to map irregular inputs to a regular latent space [14]. This method, while innovative, requires a geometric discrete Fourier transform, which is computationally demanding and lacks discretization insurance. To circumvent this, GINO limits the Fourier transform to a local GNO to improve efficiency. The locality is defined assuming the metrics of the physical space.

Additionally, the Non-Equispaced Fourier neural solvers (NFS) merge the FNO with non-equispaced interpolation layers, a method similar to global GNO [38]. However, at the architecture level, their method replaces the integration of GNO with the summation of the nearest neighbor points on the graph. This step transitions this method to a neural network, failing to deliver a discretization invariant approach. The Domain-Agnostic Fourier Neural Operators (DAFNO) represents another attempt at improvement, applying an FNO to inputs where the geometry is represented as an indicator function [39]. However, this method lacks a strategy for handling irregular point clouds. Simultaneously, researchers are exploring the combination of FNO with the attention mechanisms [3] for irregular meshes. This includes the Operator Transformer (OFormer) [40], Mesh-Independent Neural Operator (MINO) [41], and the General Neural Operator Transformer (GNOT) [42]. Although these methods incorporate attention layers, which are special types of kernel integration [3] with quadratic complexity, they face challenges when scaling up for large-scale problems.

GNNs are incorporated in the prior attempts in physical simulations involving complex geometry, primarily due to the inherent flexibility of graph structures. Early research [7, 43–45] laid the foundation for GNNs, demonstrating that physical entities, when represented as graph nodes, and their interactions, as edges, could predict the dynamics of various systems. The introduction of graph element networks [46] marked a significant development, being the first to apply GNNs to PDEs by discretizing the domain into elements. Another line of work, mesh graph networks [8–10], further

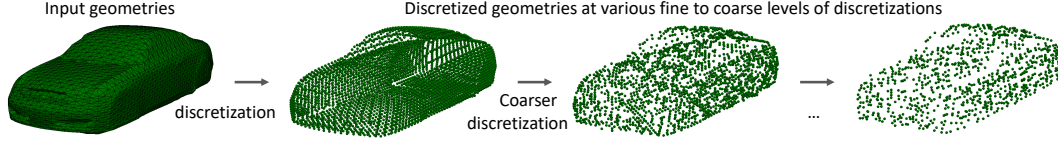

(a) An **input geometry** (continuous function) is first discretized into a series of points by subsampling it. Note that in practice, the discretization can be highly irregular. A key challenge with several scientific computing applications is that we want a method that can work on arbitrary geometries, but also that is discretization invariant, meaning that the method converges to a unique operator as we make the discretization finer.

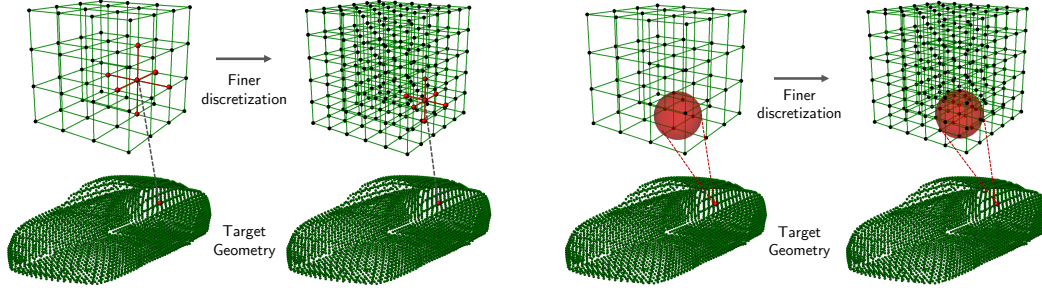

(b) **GNN** connects each point in the latent subspace (red) to its nearest neighbors in the original space (top). This is very discretization dependent, and as we increase the resolution (sample points more densely), the method becomes increasingly local and fails to capture context. In addition, the operator at the discretization limit is non-unique and depends on how the discretization is done.

(c) **GNO** instead connects each point in the latent subspace (red) to all its neighbors within an epsilon ball in the original space (top). This induces convergence to a discretization invariant solution as we increase the resolution (sample points more densely). This means GNO converges to a unique operator as the discretization becomes finer and scales to large problems without becoming overly local.

Figure 4: **Comparison of GNN and GNO** as the discretization becomes finer. GNN is discretization dependent, while GNO is discretization invariant and converges to a unique operator.

311 explored PDEs in the context of fluid and solid mechanics. [47, 48] train a Graph convolutional neural  
 312 works on the ShapeNet car dataset for inverse design. However, GNN architectures’ limitations hinder  
 313 their use in operator learning for PDEs. GNNs connect each node to its nearest neighbors according  
 314 to the graph’s metrics, not the metrics of the physical domain. As the input function’s discretization  
 315 becomes finer, each node’s nearest neighbors eventually converge to the same node, contradicting the  
 316 expectation of improved model performance with finer discretization. Furthermore, GNNs’ model  
 317 behavior at the continuous function limit lacks a unique definition, failing the discretization invariance  
 318 criterion. Consequently, as pointwise operators in function spaces at the continuous limit, GNNs  
 319 struggle to approximate general operators between function spaces, Figure 4.

## 320 6 Conclusion

321 In this work, we propose the GINO model for 3D PDEs with complex geometries. The GINO model  
 322 consists of the graph-kernel blocks for the encoder and decoder that go to a latent uniform space,  
 323 where the Fourier blocks run on the latent space to capture the global interaction. We experiment  
 324 on two CFD datasets: Shape-Net car geometries and large-scale Ahmed’s body geometries, the  
 325 latter encompassing over 600 car geometries featuring hundreds of thousands of mesh points. The  
 326 evidence from these case studies illustrates that our method offers a substantial speed improvement,  
 327 with a factor of 100,000 times acceleration in comparison to the GPU-based OpenFOAM solver.  
 328 Concurrently, our approach has achieved almost half the error rates compared to prevailing neural  
 329 networks such as 3D U-Net. This underscores the potential of our method to significantly enhance  
 330 computational efficiency while maintaining a competitive level of accuracy within the realm of CFD  
 331 applications. **Limitation:** The trained surrogate model is limited to a specific category of shapes.  
 332 The quality of the model depends on the quality of the training dataset. For CFD with more complex  
 333 shapes, it is not easy to obtain a large training dataset. We will explore physics-informed approaches  
 334 [49] and generate time-dependent high-fidelity simulations in the future.

## References

- [1] Ashley M Korzun, Gabriel Nastac, Aaron Walden, Eric J Nielsen, William T Jones, and Patrick Moran. Application of a detached eddy simulation approach with finite-rate chemistry to mars-relevant retropropulsion operating environments. In *AIAA SciTech 2022 Forum*, page 2298, 2022.
- [2] Zongyi Li, Nikola Kovachki, Kamyar Azizzadenesheli, Burigede Liu, Kaushik Bhattacharya, Andrew Stuart, and Anima Anandkumar. Neural operator: Graph kernel network for partial differential equations. *arXiv preprint arXiv:2003.03485*, 2020.
- [3] Nikola Kovachki, Zongyi Li, Burigede Liu, Kamyar Azizzadenesheli, Kaushik Bhattacharya, Andrew Stuart, and Anima Anandkumar. Neural operator: Learning maps between function spaces. *arXiv preprint arXiv:2108.08481*, 2021.
- [4] Jaideep Pathak, Shashank Subramanian, Peter Harrington, Sanjeev Raja, Ashesh Chattopadhyay, Morteza Mardani, Thorsten Kurth, David Hall, Zongyi Li, Kamyar Azizzadenesheli, et al. Fourcastnet: A global data-driven high-resolution weather model using adaptive fourier neural operators. *arXiv preprint arXiv:2202.11214*, 2022.
- [5] Gege Wen, Zongyi Li, Qirui Long, Kamyar Azizzadenesheli, Anima Anandkumar, and Sally M Benson. Real-time high-resolution co 2 geological storage prediction using nested fourier neural operators. *Energy & Environmental Science*, 16(4):1732–1741, 2023.
- [6] Zongyi Li, Nikola Kovachki, Kamyar Azizzadenesheli, Burigede Liu, Kaushik Bhattacharya, Andrew Stuart, and Anima Anandkumar. Fourier neural operator for parametric partial differential equations. *arXiv preprint arXiv:2010.08895*, 2020.
- [7] Peter Battaglia, Razvan Pascanu, Matthew Lai, Danilo Jimenez Rezende, et al. Interaction networks for learning about objects, relations and physics. *Advances in neural information processing systems*, 29, 2016.
- [8] Alvaro Sanchez-Gonzalez, Jonathan Godwin, Tobias Pfaff, Rex Ying, Jure Leskovec, and Peter Battaglia. Learning to simulate complex physics with graph networks. In *International conference on machine learning*, pages 8459–8468. PMLR, 2020.
- [9] Tobias Pfaff, Meire Fortunato, Alvaro Sanchez-Gonzalez, and Peter W Battaglia. Learning mesh-based simulation with graph networks. *arXiv preprint arXiv:2010.03409*, 2020.
- [10] Kelsey R Allen, Tatiana Lopez-Guevara, Kimberly Stachenfeld, Alvaro Sanchez-Gonzalez, Peter Battaglia, Jessica Hamrick, and Tobias Pfaff. Physical design using differentiable learned simulators. *arXiv preprint arXiv:2202.00728*, 2022.
- [11] Zongyi Li, Nikola Kovachki, Kamyar Azizzadenesheli, Burigede Liu, Andrew Stuart, Kaushik Bhattacharya, and Anima Anandkumar. Multipole graph neural operator for parametric partial differential equations. *Advances in Neural Information Processing Systems*, 33, 2020.
- [12] Remi Lam, Alvaro Sanchez-Gonzalez, Matthew Willson, Peter Wirsberger, Meire Fortunato, Alexander Pritzel, Suman Ravuri, Timo Ewalds, Ferran Alet, Zach Eaton-Rosen, et al. Graphcast: Learning skillful medium-range global weather forecasting. *arXiv preprint arXiv:2212.12794*, 2022.
- [13] James W Cooley and John W Tukey. An algorithm for the machine calculation of complex fourier series. *Mathematics of computation*, 19(90):297–301, 1965.
- [14] Zongyi Li, Daniel Zhengyu Huang, Burigede Liu, and Anima Anandkumar. Fourier neural operator with learned deformations for pdes on general geometries. *arXiv preprint arXiv:2207.05209*, 2022.
- [15] Hrvoje Jasak, Aleksandar Jemcov, Zeljko Tukovic, et al. Openfoam: A c++ library for complex physics simulations. In *International workshop on coupled methods in numerical dynamics*, volume 1000, pages 1–20, 2007.
- [16] Nobuyuki Umetani and Bernd Bickel. Learning three-dimensional flow for interactive aerodynamic design. *ACM Transactions on Graphics (TOG)*, 37(4):1–10, 2018.

- [17] Nils Thuerey, Konstantin Weißenow, Lukas Prantl, and Xiangyu Hu. Deep learning methods for reynolds-averaged navier–stokes simulations of airfoil flows. *AIAA Journal*, 58(1):25–36, 2020.
- [18] Adrian Wolny, Lorenzo Cerrone, Athul Vijayan, Rachele Tofanelli, Amaya Vilches Barro, Marion Louveaux, Christian Wenzl, Sören Strauss, David Wilson-Sánchez, Rena Lymbouridou, Susanne S Steigleder, Constantin Pape, Alberto Bailoni, Salva Duran-Nebreda, George W Bassel, Jan U Lohmann, Miltos Tsiantis, Fred A Hamprecht, Kay Schneitz, Alexis Maizel, and Anna Kreshuk. Accurate and versatile 3d segmentation of plant tissues at cellular resolution. *eLife*, 9:e57613, jul 2020. ISSN 2050-084X. doi: 10.7554/eLife.57613. URL <https://doi.org/10.7554/eLife.57613>.
- [19] Hassler Whitney. Analytic extensions of differentiable functions defined in closed sets. *Transactions of the American Mathematical Society*, 36(1):63–89, 1934.
- [20] R. Temam. *Navier-Stokes Equations: Theory and Numerical Analysis*. Studies in mathematics and its applications. North-Holland, 1984.
- [21] Elias M. Stein. *Singular Integrals and Differentiability Properties of Functions*. Princeton University Press, 1970.
- [22] Albert Cohen, Christoph Schwab, and Jakob Zech. Shape holomorphy of the stationary navier–stokes equations. *SIAM Journal on Mathematical Analysis*, 50(2):1720–1752, 2018.
- [23] Vincent Sitzmann, Julien Martel, Alexander Bergman, David Lindell, and Gordon Wetzstein. Implicit neural representations with periodic activation functions. *Advances in Neural Information Processing Systems*, 33:7462–7473, 2020.
- [24] Qian-Yi Zhou, Jaesik Park, and Vladlen Koltun. Open3D: A modern library for 3D data processing. *arXiv:1801.09847*, 2018.
- [25] Matthias Fey et al. Pytorch extension library of optimized scatter operations, 2023. URL [https://github.com/rusty1s/pytorch\\_scatter](https://github.com/rusty1s/pytorch_scatter).
- [26] Jean Kossaifi, Nikola Borislavov Kovachki, Kamyar Azizzadenesheli, and Anima Anandkumar. Multi-grid tensorized fourier neural operator for high resolution PDEs, 2023. URL <https://openreview.net/forum?id=po-oqRst4Xm>.
- [27] Xun Huang and Serge J. Belongie. Arbitrary style transfer in real-time with adaptive instance normalization. *CoRR*, abs/1703.06868, 2017.
- [28] Dmitry Ulyanov, Andrea Vedaldi, and Victor Lempitsky. Instance normalization: The missing ingredient for fast stylization. *arXiv preprint arXiv:1607.08022*, 2016.
- [29] Syed R Ahmed, G Ramm, and Gunter Faltin. Some salient features of the time-averaged ground vehicle wake. *SAE transactions*, pages 473–503, 1984.
- [30] Florianr Menter. Zonal two equation kw turbulence models for aerodynamic flows. In *23rd fluid dynamics, plasmadynamics, and lasers conference*, page 2906, 1993.
- [31] Angel X Chang, Thomas Funkhouser, Leonidas Guibas, Pat Hanrahan, Qixing Huang, Zimo Li, Silvio Savarese, Manolis Savva, Shuran Song, Hao Su, et al. Shapenet: An information-rich 3d model repository. *arXiv preprint arXiv:1512.03012*, 2015.
- [32] Olek C Zienkiewicz, Robert Leroy Taylor, and Perumal Nithiarasu. *The finite element method for fluid dynamics*. Butterworth-Heinemann, 2013.
- [33] Kaushik Bhattacharya, Bamdad Hosseini, Nikola B Kovachki, and Andrew M Stuart. Model reduction and neural networks for parametric pdes. *The SMAI journal of computational mathematics*, 7:121–157, 2021.
- [34] Georgios Kissas, Jacob H Seidman, Leonardo Ferreira Guilhoto, Victor M Preciado, George J Pappas, and Paris Perdikaris. Learning operators with coupled attention. *Journal of Machine Learning Research*, 23(215):1–63, 2022.



- 430 [35] Md Ashiqur Rahman, Zachary E Ross, and Kamyar Azizzadenesheli. U-no: U-shaped neural  
431 operators. *arXiv preprint arXiv:2204.11127*, 2022.
- 432 [36] Yan Yang, Angela F Gao, Jorge C Castellanos, Zachary E Ross, Kamyar Azizzadenesheli, and  
433 Robert W Clayton. Seismic wave propagation and inversion with neural operators. *The Seismic  
434 Record*, 1(3):126–134, 2021.
- 435 [37] Hongyu Sun, Yan Yang, Kamyar Azizzadenesheli, Robert W Clayton, and Zachary E Ross.  
436 Accelerating time-reversal imaging with neural operators for real-time earthquake locations.  
437 *arXiv preprint arXiv:2210.06636*, 2022.
- 438 [38] Haitao Lin, Lirong Wu, Yongjie Xu, Yufei Huang, Siyuan Li, Guojian Zhao, Li Cari, et al.  
439 Non-equispaced fourier neural solvers for pdes. *arXiv preprint arXiv:2212.04689*, 2022.
- 440 [39] Ning Liu, Siavash Jafarzadeh, and Yue Yu. Domain agnostic fourier neural operators. *arXiv  
441 preprint arXiv:2305.00478*, 2023.
- 442 [40] Zijie Li, Kazem Meidani, and Amir Barati Farimani. Transformer for partial differential  
443 equations’ operator learning. *arXiv preprint arXiv:2205.13671*, 2022.
- 444 [41] Seungjun Lee. Mesh-independent operator learning for partial differential equations. In *ICML  
445 2022 2nd AI for Science Workshop*.
- 446 [42] Zhongkai Hao, Chengyang Ying, Zhengyi Wang, Hang Su, Yinpeng Dong, Songming Liu,  
447 Ze Cheng, Jun Zhu, and Jian Song. Gnot: A general neural operator transformer for operator  
448 learning. *arXiv preprint arXiv:2302.14376*, 2023.
- 449 [43] Thomas N Kipf and Max Welling. Semi-supervised classification with graph convolutional  
450 networks. *arXiv preprint arXiv:1609.02907*, 2016.
- 451 [44] Will Hamilton, Zhitao Ying, and Jure Leskovec. Inductive representation learning on large  
452 graphs. *Advances in neural information processing systems*, 30, 2017.
- 453 [45] Peter W Battaglia, Jessica B Hamrick, Victor Bapst, Alvaro Sanchez-Gonzalez, Vinicius  
454 Zambaldi, Mateusz Malinowski, Andrea Tacchetti, David Raposo, Adam Santoro, Ryan  
455 Faulkner, et al. Relational inductive biases, deep learning, and graph networks. *arXiv preprint  
456 arXiv:1806.01261*, 2018.
- 457 [46] Ferran Alet, Adarsh Keshav Jeewajee, Maria Bauza Villalonga, Alberto Rodriguez, Tomas  
458 Lozano-Perez, and Leslie Kaelbling. Graph element networks: adaptive, structured computation  
459 and memory. In *International Conference on Machine Learning*, pages 212–222. PMLR, 2019.
- 460 [47] Edoardo Remelli, Artem Lukoianov, Stephan Richter, Benoit Guillard, Timur Bagautdinov,  
461 Pierre Baque, and Pascal Fua. Meshsdf: Differentiable iso-surface extraction. *Advances in  
462 Neural Information Processing Systems*, 33:22468–22478, 2020.
- 463 [48] Nikita Durasov, Artem Lukoyanov, Jonathan Donier, and Pascal Fua. Debosh: Deep bayesian  
464 shape optimization. *arXiv preprint arXiv:2109.13337*, 2021.
- 465 [49] Zongyi Li, Hongkai Zheng, Nikola Kovachki, David Jin, Haoxuan Chen, Burigede Liu, Kamyar  
466 Azizzadenesheli, and Anima Anandkumar. Physics-informed neural operator for learning partial  
467 differential equations. *arXiv preprint arXiv:2111.03794*, 2021.
- 468 [50] Matthias Fey and Jan Eric Lenssen. Fast graph representation learning with pytorch geometric.  
469 *arXiv preprint arXiv:1903.02428*, 2019.

## 7 Appendix

### 7.1 Experiments and Ablations

**Benchmarks.** This study analyzes several existing models, including GNO, GeoFNO, and 3D UNet. All models are trained using the Adam optimizer for 100 epochs, with the learning rate halved at the 50th epoch. We consider starting learning rates such as [0.002, 0.001, 0.0005, 0.00025, 0.0001], with the most favorable results attained at the rates 0.00025 and 0.0001. For GeoFNO, a 2D spherical latent space is employed due to instability with 3D deformation, leading to a faster runtime than other 3D-based models. In the 3D UNet model, we evaluate channel dimensions ranging from [64, 128, 256] and depths from [4, 5, 6]. Utilizing a larger model can reduce UNet’s error rate to 11.1%. For the GINO model, we consider channel dimensions [32, 48, 64, 80], latent space [32, 48, 64, 80], and radius from 0.025 to 0.055 (with the domain size normalized to [-1, 1]). As depicted in Figure 3(a) and Table 3, larger latent spaces and radii yield superior results.

**Encoder and Decoder.** For the GINO model, we contemplate two configurations: an encoder-decoder design utilizing GNO layers for both input and output, and a decoder-only design which takes the fixed SDF input directly from the latent space and employs the GNO layer solely for output. When the input mesh significantly exceeds the latent grid in size, the encoder proves beneficial in information extraction. However, when the size of the latent grid matches or surpasses the input mesh, an encoder becomes redundant. As depicted in Table 4, both the encoder-decoder and decoder-only designs exhibit comparable performance.

**Parallelism.** Data parallelism is incorporated in the GNO decoder. In each batch, the model sub-samples 5,000 mesh points to calculate the pressure field. As query points are independent, they can be effortlessly batched. This parallel strategy allows for a larger radius in the decoder GNO. Without a parallel implementation, a radius of 0.025 leads to 300,000 edges, rapidly depleting GPU memory. Yet, with parallelism, the algorithm can handle a radius of 0.055. Implementing parallelism in the encoder is left for future exploration.

**Weights in the Riemann Sum.** As mentioned in the GNO section, the integral is approximated as a Riemann sum. In the decoder, the weight  $\mu(y)$  is constant, reflecting the uniformity of the latent space. Conversely, in the encoder, weights are determined as the area of the triangle. For increased expressiveness, the weight is also integrated into the kernel, resulting in a kernel of the form  $\kappa(x, y, \mu(y))$ . However, it’s worth noting that the encoder’s significance diminishes when a large latent space is in use.

**Sub-sampling and Super-resolution.** The computational cost of the models increases rapidly with the number of mesh points. Training models with sub-sampled meshes saves significant computational resources. Discretization-invariant models can achieve such super-resolution; they can be trained on coarse mesh points and generalized to a fine evaluation mesh. We investigate the super-resolution capabilities of UNet (interp), FNO (interp), and GINO. As demonstrated in Table 5, GINO maintains consistency across all resolutions. UNet (interp) and FNO (interp) can also adapt to denser test meshes, albeit with a marginally higher error rate, based on linear interpolation. The results corroborate GINO’s discretization-invariant nature.

**Hash-table-based Graph Construction.** For graph construction and kernel integration computation in this work, we utilize the CUDA implementation from Open3D [24] and torch-scatter [25], respectively. This approach is 40% faster compared to a previous GNO implementation that constructed the graphs with pairwise distance and used the PyTorch Geometric library[50]. These implementations are Incorporated into the GNO encoder and decoder in GINO.

In addition, the CUDA hash based implementation requires less memory footprint  $O(Ndr^3)$  compare to the standard pairwise distance which requires  $O(N^2)$  memory and computation complexity. For 10k points, hash-based implementation requires 6GB of GPU memory while the pairwise method requires 24GB of GPU memory; making the hash-based method more scalable for larger graphs.

### 7.2 Data Generation

Industry-standard vehicle aerodynamics simulations are generated in this study, utilizing the Ahmed-body shapes as a foundation [29]. Examples are illustrated in Figure 5. These shapes are characterized by six design parameters: length, width, height, ground clearance, slant angle, and fillet radius, as outlined in Table 6. The inlet velocity varies from 10m/s to 70m/s, consequently resulting in

Table 3: Ablation on the Ahmed-body with different sizes of the latent space

| Model | latent resolution | radius | training error | test error |
|-------|-------------------|--------|----------------|------------|
| GINO  | 32                | 0.055  | 14.11%         | 13.59%     |
| GINO  | 48                | 0.055  | 8.99%          | 10.20%     |
| GINO  | 64                | 0.055  | 6.00%          | 8.47%      |
| GINO  | 80                | 0.055  | 5.77%          | 7.87%      |
| GINO  | 32                | 0.110  | 8.66%          | 10.10%     |
| GINO  | 48                | 0.073  | 7.25%          | 9.17%      |
| GINO  | 64                | 0.055  | 6.00%          | 8.47%      |
| GINO  | 80                | 0.044  | 6.22%          | 7.89%      |

When fixing the radius, larger latent resolutions lead to better performance. The gaps become smaller when fixing the number of edges and scaling the radius correspondingly.

Table 4: Ablation on the Ahmed-body with different choices of the radius.

| Model                            | radius 0.025   |            | radius 0.035   |            |
|----------------------------------|----------------|------------|----------------|------------|
|                                  | training error | test error | training error | test error |
| GINO (encoder-decoder)           | 12.91%         | 13.07%     | 8.65%          | 10.32%     |
| GINO (encoder-decoder, weighted) | 12.94%         | 12.76%     | 9.26%          | 9.90%      |
| GINO (decoder)                   | 12.62%         | 12.74%     | 8.82%          | 9.39%      |

The choice of radius is significant. A larger radius leads to better performance for all models.

Reynolds numbers ranging from  $4.35 \times 10^5$  to  $6.82 \times 10^6$ . This varying input adds complexity to the problem.

The simulations employ the GPU-accelerated OpenFOAM solver for steady-state analyses, applying the SST  $k - \omega$  turbulence model. Consisting of 7.2 million mesh points in total, including 100k surface mesh points, each simulation is run on 2 Nvidia v100 GPUs and 16 CPU cores, taking between 7 to 19 hours to complete.

For this study, the focus is solely on the prediction of the pressure field. It is our hope that this dataset can be utilized in future research, potentially aiding in full-field simulation of the velocity field, as well as the inverse design.

Table 5: **Super-resolution on sub-sampled meshes**

| <b>Model</b>           | <b>Sampling rate</b> | <b>1/2</b> | <b>1/4</b> | <b>1/6</b> | <b>1/8</b> |
|------------------------|----------------------|------------|------------|------------|------------|
| Unet (interp)          |                      | 16.5%      | 13.8%      | 13.9%      | 15.6%      |
| FNO (interp)           |                      | 14.2%      | 14.1%      | 13.3%      | 11.5%      |
| GINO (encoder-decoder) |                      | 8.8%       | 9.4%       | 9.4%       | 9.7%       |

Table 6: **Design of the Ahmed-body shapes**

| <b>Parameters</b> | <b>steps</b> | <b>lower bound</b> | <b>upper bound</b> |
|-------------------|--------------|--------------------|--------------------|
| Length            | 20           | 644                | 1444               |
| Width             | 10           | 239                | 539                |
| Height            | 5            | 208                | 368                |
| Ground Clearance  | 2.5          | 30                 | 90                 |
| Slant Angle       | 2.5          | 0                  | 40                 |
| Fillet Radius     | 2.5          | 80                 | 120                |
| Velocity          | 4            | 10                 | 70                 |

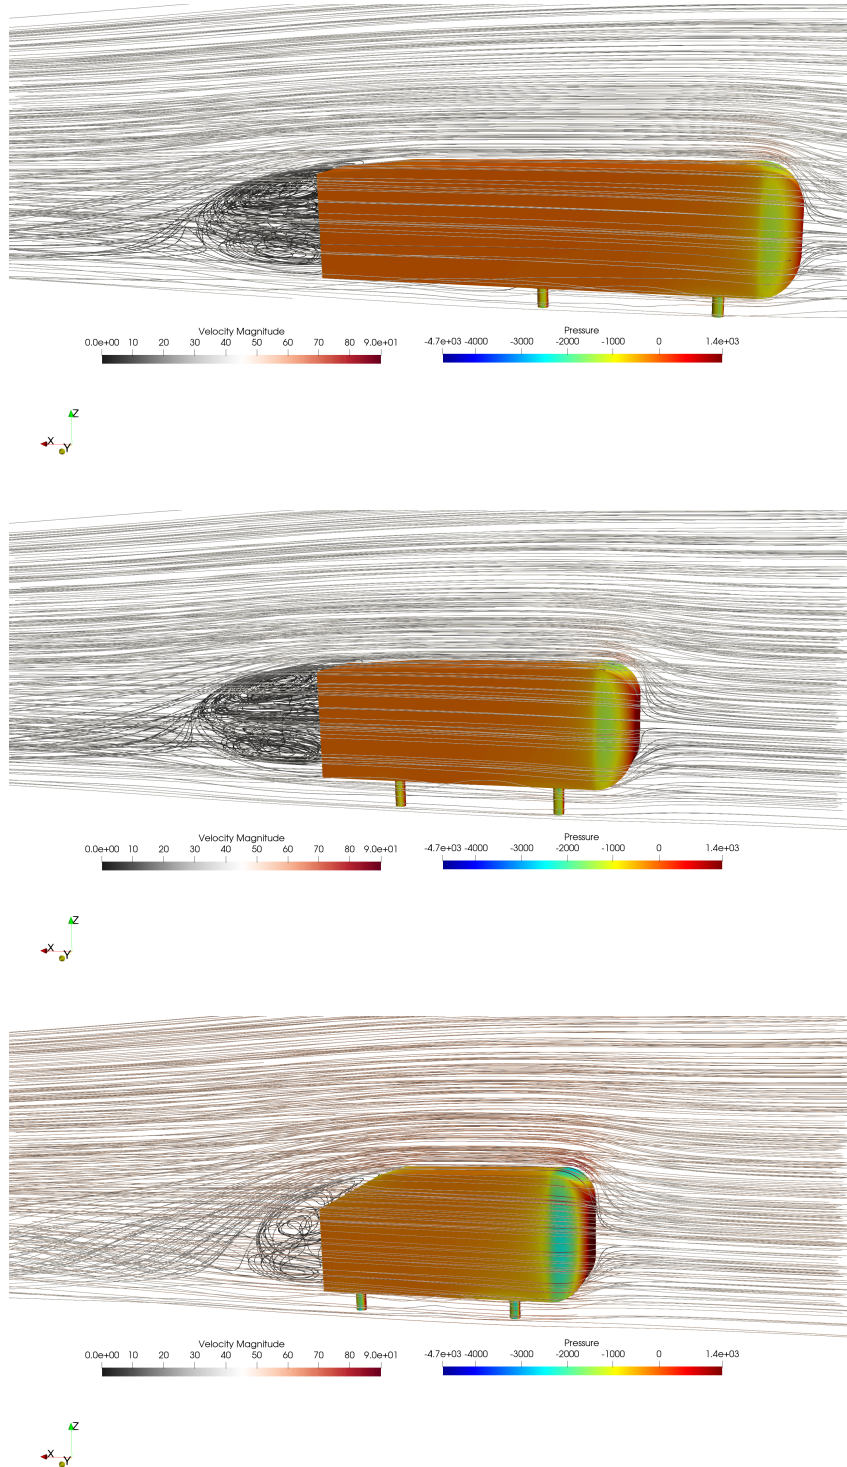

Figure 5: Examples of the Ahmed-body Dataset
